# Supplementary material
Source: MDPI journal article supplement (https://www.mdpi.com/2504-477X/8/1/19)
Supplement: s1 [file s1]

**(Supplementary Information)**

**Low-pressure-plasma-processed NiCo-metalorganic framework for  
oxygen evolution reaction and its application to alkaline water  
electrolysis module**

**Yu-Lun Su<sup>1,2</sup>, Shuo-En Yu<sup>2,3</sup>, I-Chih Ni<sup>4</sup>, Chih-I Wu<sup>3,4</sup>, Yong-Song Chen<sup>5</sup>, Yi-  
Cheng Chuang<sup>5</sup>, I-Chun Cheng<sup>4</sup>, Jian-Zhang Chen<sup>1,2,3,\*</sup>**

<sup>1</sup> Graduate Institute of Applied Mechanics, National Taiwan University, Taipei City 10617, Taiwan

<sup>2</sup> Advanced Research Center for Green Materials Science and Technology, National Taiwan University,  
Taipei City 10617, Taiwan

<sup>3</sup> Graduate School of Advanced Technology, National Taiwan University, Taipei City 10617, Taiwan

<sup>4</sup> Graduate Institute of Photonics and Optoelectronics and Department of Electrical Engineering,  
National Taiwan University, Taipei City 10617, Taiwan

<sup>5</sup> Department of Mechanical Engineering and Advanced Institute of Manufacturing with High-Tech  
Innovations, National Chung Cheng University, Chiayi County 621301, Taiwan

\* Correspondence: jchen@ntu.edu.tw (J.Z.C.); imeysc@ccu.edu.tw (Y.S.C.)

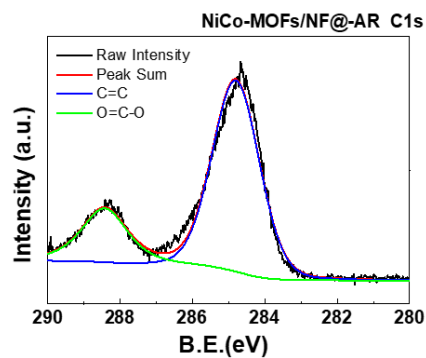

Figure S1. XPS spectra of C1 s.

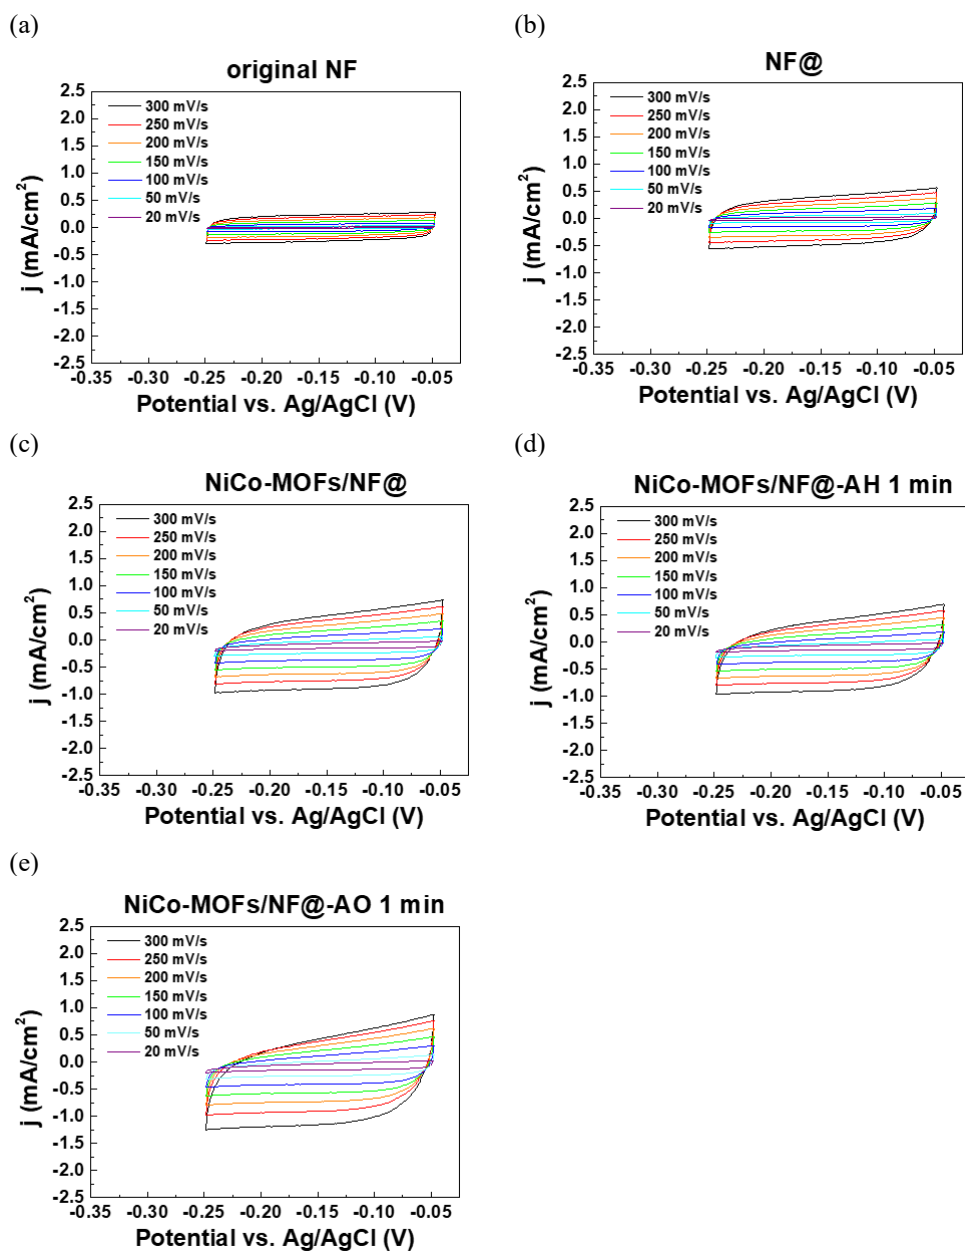

Figure S2. CV potential curves at different scan rates. (a) original NF, (b) NF@, (c) NiCo-MOFs/NF, (d) NiCo-MOFs/NF@-AH, and (e) NiCo-MOFs/NF@-AO.
